# Supplementary material for: Sustainable Catalytic Synthesis of 2,5-Diformylfuran from Various Carbohydrates
Source: MDPI journal article supplement (doi:10.3390/catal12040360), 2022-03-23
Supplement: s1 [file s1]

*Electronic Supplementary Information for*

**Sustainable Catalytic Synthesis of 2,5-Diformylfuran from Various Carbohydrates**

*Si Ae Kim*<sup>1</sup>, *Kihyuk Sung*<sup>1</sup>, *June Young Jang*<sup>2</sup>, *Sohee Bang*<sup>2</sup>, *Seung Uk Son*<sup>2,\*</sup> and *Hye-Young Jang*<sup>1,\*</sup>

<sup>1</sup> *Department of Energy Systems Research, Ajou University, Suwon 16499, Korea*

<sup>2</sup> *Department of Chemistry, Sungkyunkwan University, Suwon 16419, Korea*

E-mail address of corresponding authors: sson@skku.edu (S.U.S.) hyjang2@ajou.ac.kr (H.-Y.J.)

|      |                                                                |     |
|------|----------------------------------------------------------------|-----|
| I.   | Experimental procedures .....                                  | S2  |
| II.  | Conversion of carbohydrates to DFF .....                       | S4  |
| III. | Dimethyl sulfide trapping experiment.....                      | S5  |
| IV.  | Characterization of heterogeneous catalysts.....               | S7  |
| V.   | Recycling experiments .....                                    | S11 |
| VI.  | Spectral data of 2,5-diformylfuran.....                        | S12 |
| VII. | <sup>1</sup> H NMR of the reaction mixture using fructose..... | S15 |

## **I. Experimental procedures**

### **General information**

D-Fructose, D-glucose, anhydrous DMSO, and tetrabutylammonium bromide,  $\text{Al}(\text{OTf})_3$  were received from Sigma Aldrich (Korea). Diphenyl disulfide, D-mannose, D-galactose, and sucrose were received from TCI (Korea). Proton nuclear magnetic resonance ( $^1\text{H}$  NMR) spectra were recorded with a JEOL Resonance ECZ600R (600 MHz) spectrometer. Chemical shifts are reported in delta ( $\delta$ ) units, parts per million (ppm) relative to the center of the singlet at 2.50 ppm for  $\text{DMSO-d}_6$ . Carbon-13 nuclear magnetic resonance ( $^{13}\text{C}$  NMR) spectra were recorded with a JEOL Resonance ECZ600R (151 MHz). Chemical shifts are reported in delta ( $\delta$ ) units, parts per million (ppm) relative to the center of the multiplet at 39.52 ppm for  $\text{DMSO-d}_6$ . High resolution mass spectra were obtained with a magnetic sector-electric sector double focusing mass analyzer equipment. IR spectra were recorded with a Bruker VERTEX 70 IF-IR spectrometer. Melting points of the compounds were checked in open capillary and were uncorrected. Elemental analyses were performed by a Flash 2000 (Thermo Scientific). SEM images were obtained by a JSM7100F. TEM and EDS-elemental mapping images were obtained by a JEOL 2100F. ICP-OES analysis was conducted by a 5900 ICP-OES. Combustion ion chromatograph was conducted by a AQF-2100H. PXRD patterns were obtained by a Rigaku MAX-2200. TGA curves were obtained by a Seiko Exstar 7300.

### **Experimental procedure for the synthesis of DFF from fructose**

Fructose (0.25 mmol), PhSSPh (0.25 mmol), TBPBr (10 mol%), and DMSO (0.7 ml) were added into the sealed tube. The mixture was heated at 120 °C for 16 h. After the reaction, the mixture was cooled down to ambient temperature, and the solvent was evaporated. The product was isolated by flash column chromatography with EtOAc/hexane as an eluent.

### **Experimental procedure for the synthesis of DFF from glucose**

Glucose (0.25 mmol),  $\text{Al}(\text{OTf})_3$  (10 mol%), PhSSPh (0.25 mmol), TBPBr (10 mol%), and DMSO (0.7 ml) were added into the sealed tube. The mixture was heated at 120 °C for 16 h. After the reaction, the mixture was cooled down to ambient temperature, and the solvent was evaporated. The product was isolated by flash column chromatography with EtOAc/hexane as an eluent.

### **Experimental procedure for the synthesis of DFF from various carbohydrates**

Carbohydrate (0.25 mmol),  $\text{Al}(\text{OTf})_3$  (10 mol%), PhSSPh (0.25 mmol), TBPBr (10 mol%), and DMSO (0.7 ml) were added into the sealed tube. The mixture was heated at 120 °C for 16 h. After the reaction, the mixture was cooled down to ambient temperature, and the solvent was evaporated. The product was isolated by flash column chromatography with EtOAc/hexane as an eluent.

### Synthetic procedure of heterogeneous catalysts

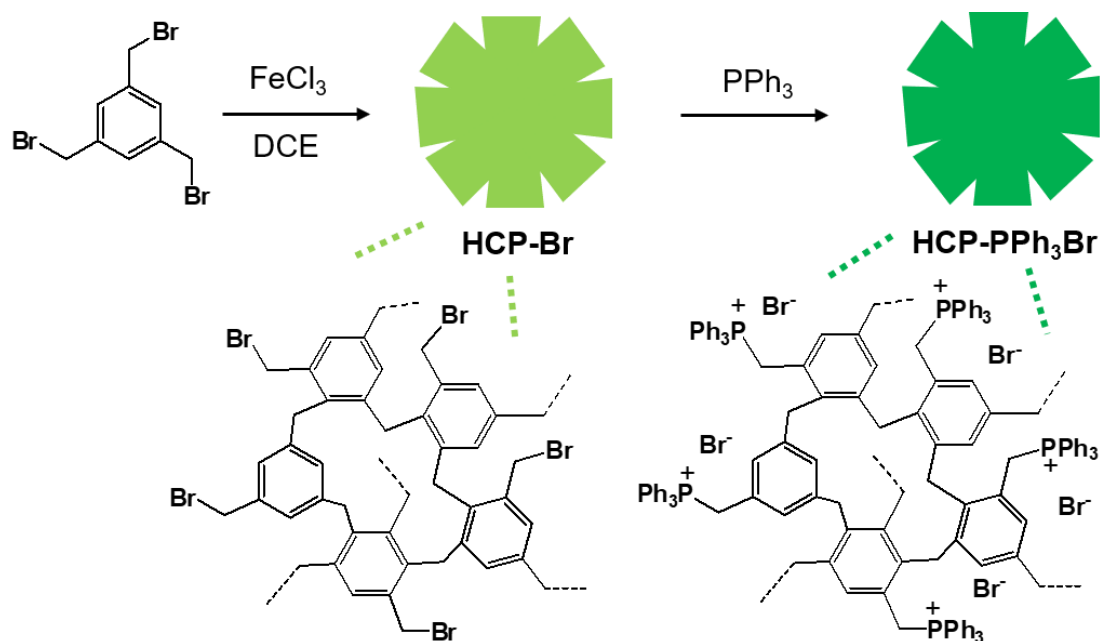

**Scheme S1.** Synthesis of *HCP-PPh<sub>3</sub>Br*

#### *Preparation of HCP-Br*

1,3,5-Tri(bromomethyl)benzene (0.36 g, 1.0 mmol) and 1,2-dichloroethane (240 ml) were added into a flame-dried 500 ml round bottom flask under Ar atmosphere. After the reaction mixture was stirred at room temperature, FeCl<sub>3</sub> (0.65 g, 4.0 mmol) was added. After the mixture was heated at 80 °C for 24 hours, it was cooled to room temperature. The powder (HCP-Br) was isolated by centrifugation, washed with a mixture of dichloromethane (15 ml), methanol (15 ml), and acetone (15 ml) 10 times, and dried under vacuum.

#### *Synthesis of HCP-PPh<sub>3</sub>Br*

HCP-Br (70 mg), toluene (20 ml), and triphenylphosphine (0.26 mg, 1.0 mmol) were added into a flame-dried 50 ml two-neck Schlenk flask under Ar atmosphere. After the mixture was heated at 80 °C for 24 hours, it was cooled to room temperature. The powder (HCP-PPh<sub>3</sub>Br) was isolated by centrifugation, washed with a mixture of dichloromethane (15 ml), methanol (15 ml), and acetone (15 ml) 10 times, and dried under vacuum. The contents of phosphorus and bromine in HCP-PPh<sub>3</sub>Br were analyzed to be 0.89 mmol/g and 0.74 mmol/g by the ICP-OES and combustion ionic chromatography, respectively.

## II. Conversion of carbohydrates to DFF

**Table S1.** Reactions of D-fructose to form DFF.

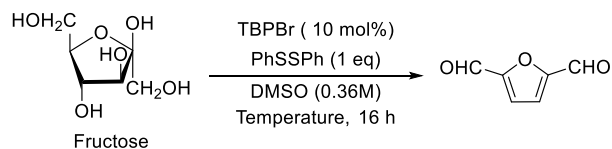

| Entry | Temperature (°C) | DFF yield (%) <sup>a</sup> |
|-------|------------------|----------------------------|
| 1     | 100              | 25                         |
| 2     | 120              | 92                         |
| 3     | 150              | 50                         |

<sup>a</sup>Isolated yields.

**Table S2.** Reactions of D-glucose to form DFF.

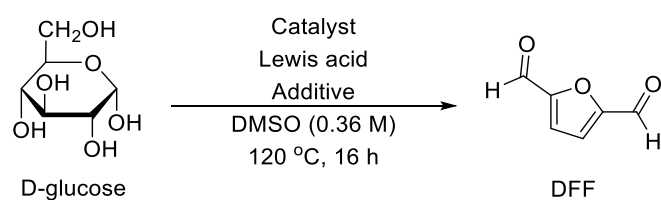

| Entry | Catalyst (mol%) | Lewis acid (mol%)                         | Additive (eq.) | HMF yield (%) <sup>a</sup> | DFF yield (%) <sup>b</sup> | Conversion (%) |
|-------|-----------------|-------------------------------------------|----------------|----------------------------|----------------------------|----------------|
| 1     | TBPBr (10)      | -                                         | PhSSPh (1 eq)  | -                          | 26                         | >99            |
| 2     | TBPBr (10)      | Al(OTf) <sub>3</sub> (10)                 | PhSSPh (1 eq)  | -                          | 60                         | >99            |
| 3     | TBPBr (10)      | In(OTf) <sub>3</sub> (10)                 | PhSSPh (1 eq)  | 37                         | -                          | >99            |
| 4     | TBPBr (10)      | Cu(OTf) <sub>2</sub> (10)                 | PhSSPh (1 eq)  | 13                         | -                          | >99            |
| 5     | TBPBr (10)      | AlCl <sub>3</sub> ·6H <sub>2</sub> O (10) | PhSSPh (1 eq)  | -                          | -                          | >99            |
| 6     | TBPBr (10)      | Zn(OTf) <sub>2</sub> (10)                 | PhSSPh (1 eq)  | -                          | -                          | >99            |
| 7     | TBPBr (10)      | Al(OTf) <sub>3</sub> (10)                 | -              | 58                         | 3                          | >99            |

<sup>a</sup>H NMR yields using 1,3,5-trimethoxybenzene as an internal standard. <sup>b</sup>Isolated yields.

### III. Dimethyl sulfide trapping experiment

**Procedure:** Fructose (0.25 mmol), PhSSPh (0.25 mmol), TBPBr (10 mol%), and DMSO (0.7 ml) were added into a round bottom flask. The flask was connected with a bubbler filled with  $\text{CHCl}_3$ . The mixture was heated at 120 °C for 16 hours. Dimethyl sulfide in  $\text{CHCl}_3$  (0.5 ml) was mixed with 0.15 ml of  $\text{CDCl}_3$  for the  $^1\text{H}$  NMR analysis.

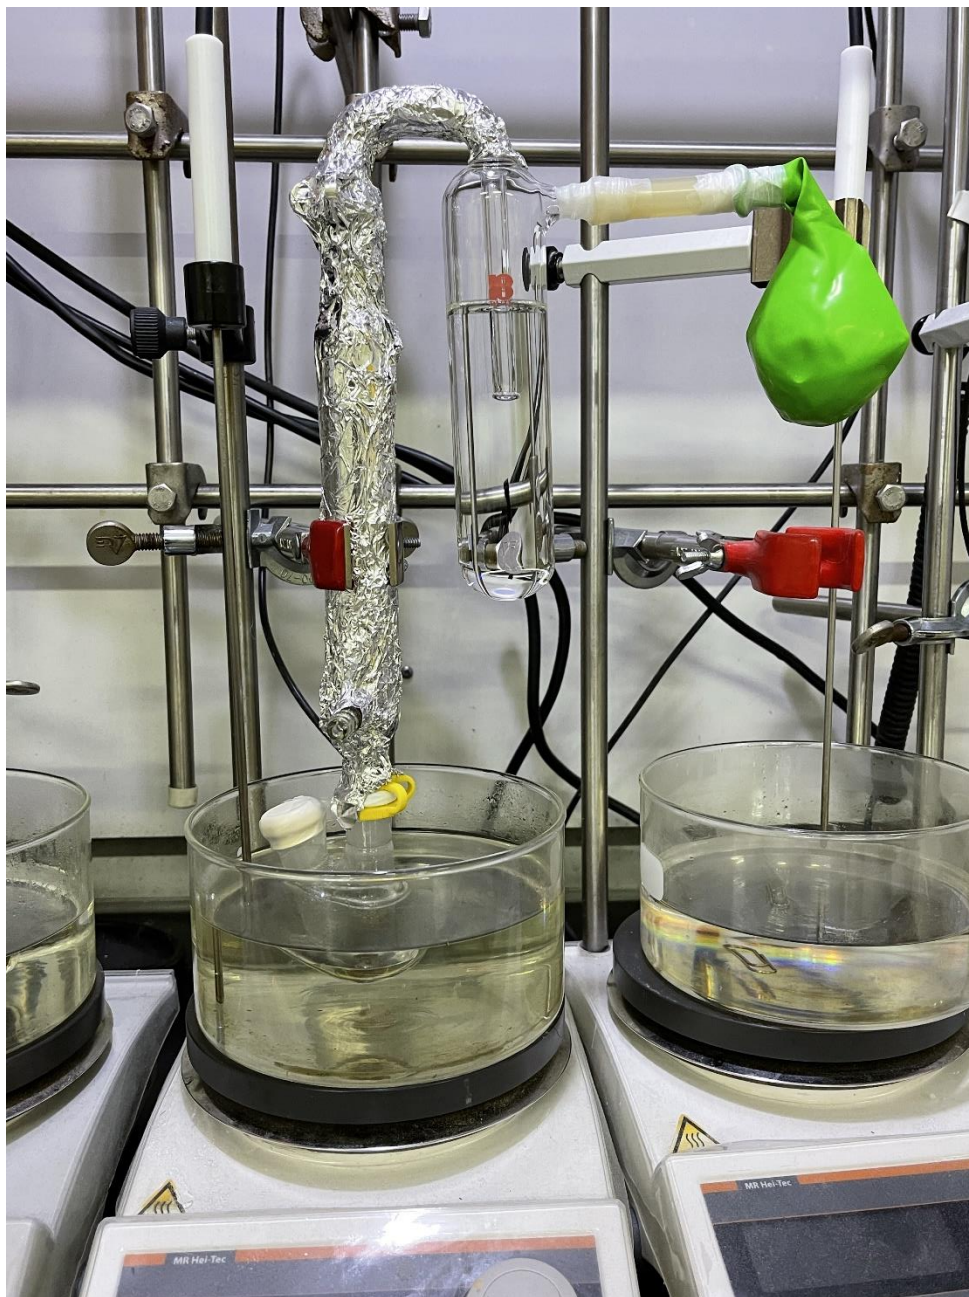

**Figure S1.** Experimental setup for the dimethyl sulfide trapping experiment.

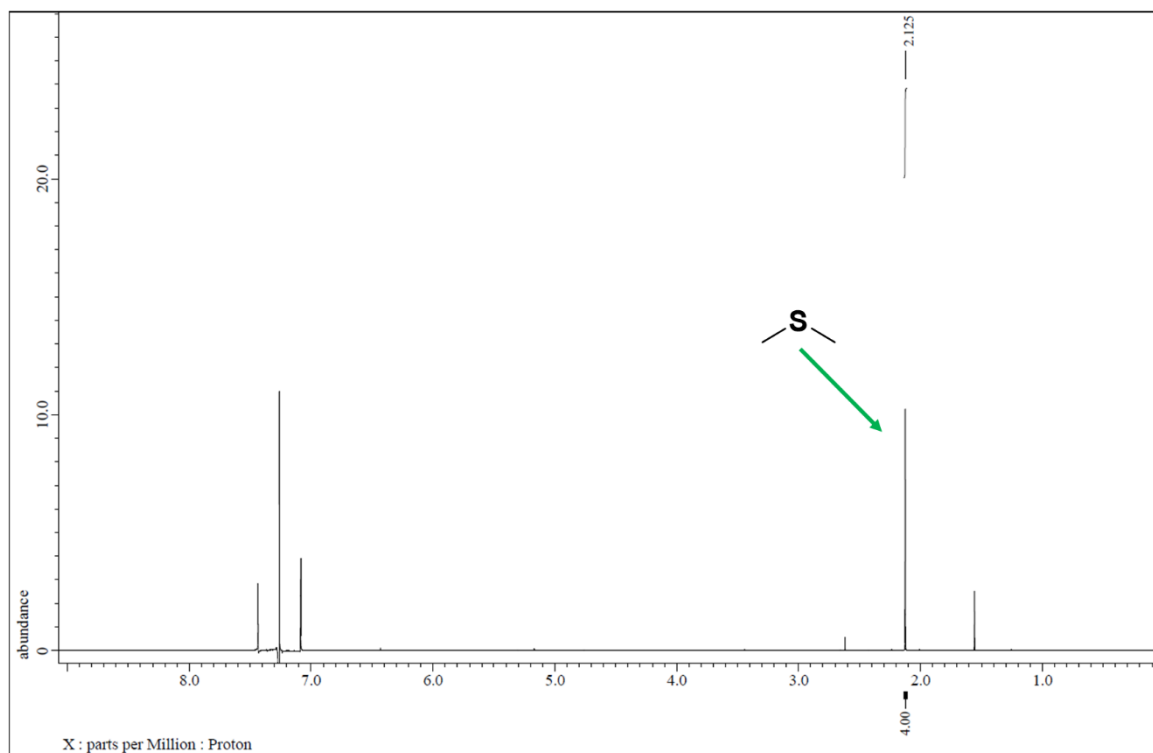

**Figure S2.**  $^1\text{H}$  NMR spectra of dimethyl sulfide trapping experiment.<sup>1</sup>

<sup>1</sup> S. Song.; X. Huang.; Y.-F. Liang.; C. Tang.; X. Li.; N. Jiao.; From simple organobromides or olefins to highly value added bromohydrins: a versatile performance of dimethyl sulfoxide. *Green Chem.*, **2015**, *17*, 2727-2731. <https://doi.org/10.1039/C5GC00184F>.



#### IV. Characterization of HCP-Br and HCP-PPh<sub>3</sub>Br

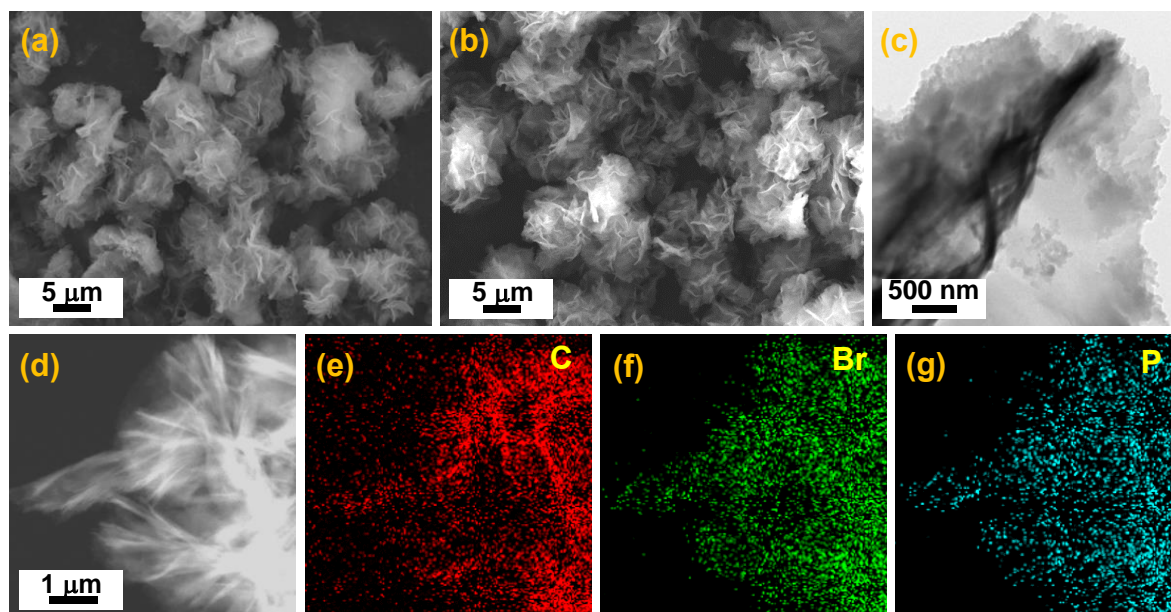

**Figure S3.** (a–b) SEM images of HCP-Br and HCP-PPh<sub>3</sub>Br. (c) A TEM image of HCP-PPh<sub>3</sub>Br. (d–g) EDS-elemental mapping images of HCP-PPh<sub>3</sub>Br. (Red: Carbon, Green: Bromine, Blue: Phosphorus)



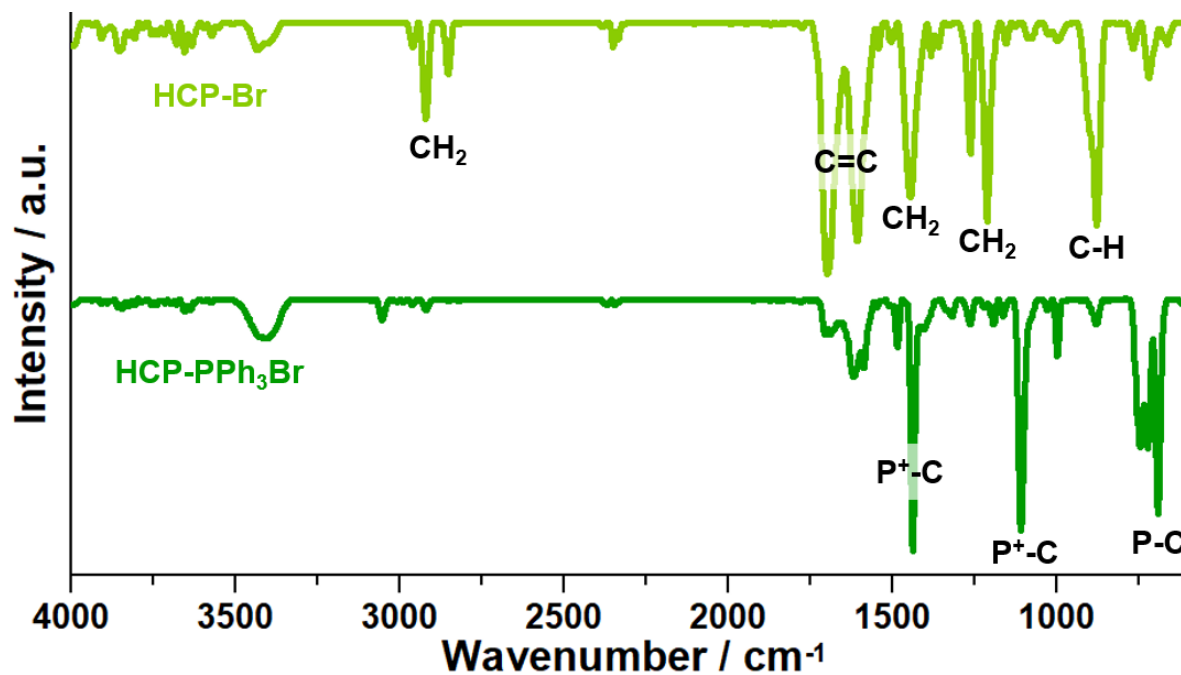

Figure S4. IR spectra of HCP-Br and HCP-PPh<sub>3</sub>Br<sup>2,3</sup>

<sup>2</sup> D. Chakraborty.; S. Nandi.; M. A. Sinnwell.; J. Liu.; R. Kushwaha.; P. K. Thallapally.; R. Vaidhyanathan. Hyper-cross-linked porous organic frameworks with ultramicropores for selective xenon capture. *ACS Appl. Mater. Interfaces*. **2019**, *11*, 13279–13284. <https://doi.org/10.1021/acsami.9b01619>.

<sup>3</sup> M. Arroyo.; R.V. Rufino.; M.A. Lopez-Manchado.; J. F. Fernandez. Relevant features of bentonite modification with a phosphonium salt. *J. Nanosci. Nanotechnol.* **2006**, *6*, 2151-2154. <https://doi.org/10.1166/jnn.2006.346>.

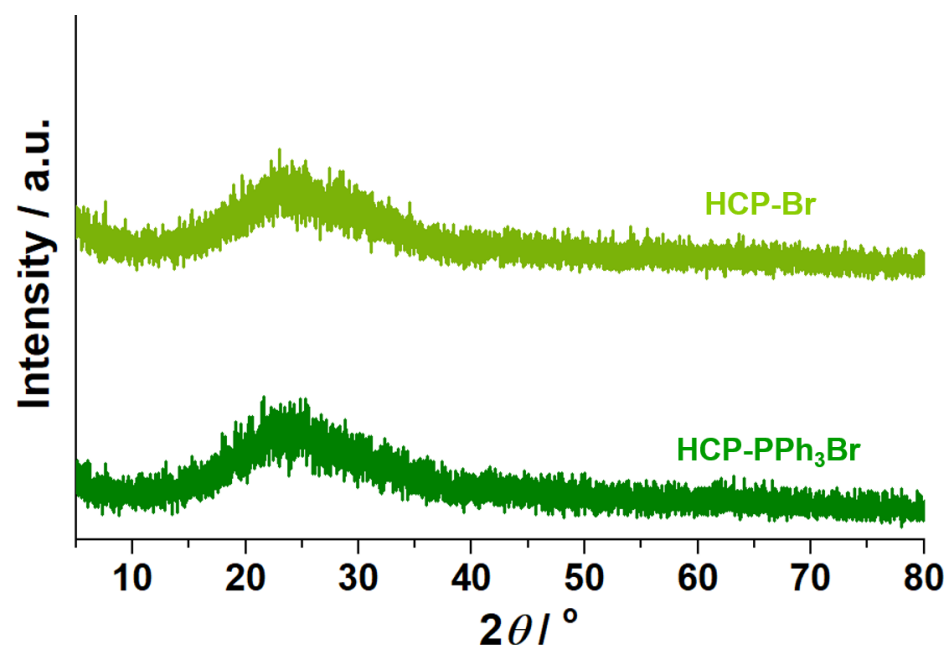

Figure S5. PXRD patterns of HCP-Br and HCP-PPh<sub>3</sub>Br.

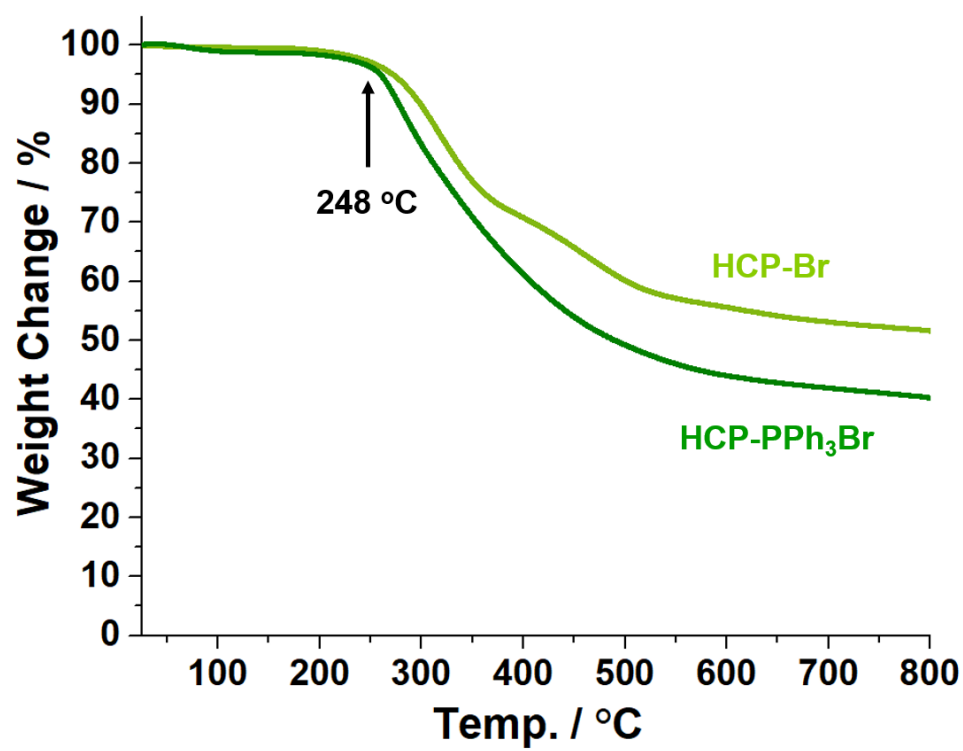

**Figure S6.** TGA curves of HCP-Br and HCP-PPh<sub>3</sub>Br

## V. Recycling experiment

**Catalytic procedure:** Fructose (0.25 mmol), PhSSPh (0.25 mmol), HCP-PPh<sub>3</sub>Br (10 mol% Br<sup>-</sup>), and DMSO (1.4 ml) were added into the sealed tube. The mixture was heated at 120 °C for 12 h. After the reaction, substrates and solvent were added subsequently for the next cycle.

**Table S3.** Recycling experiments.

| Entry | Cycle | DFP<br>yield (%) |
|-------|-------|------------------|
| 1     | 1     | 70.6             |
| 2     | 2     | 67.8             |
| 3     | 3     | 67.1             |
| 4     | 4     | 69.1             |

## VI. Spectral data of 2,5-diformylfuran

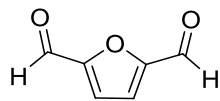

**<sup>1</sup>H NMR (DMSO-d<sub>6</sub>, 600 MHz):** δ 9.81 (s, 2H), 7.66 (s, 2H) ppm.

**<sup>13</sup>C NMR (DMSO, 150 MHz):** δ 180.7, 153.6, 122.0 ppm.

**HRMS *m/z* (EI<sup>+</sup>):** C<sub>6</sub>H<sub>4</sub>O<sub>3</sub> calcd: 124.02, found: 124.016.

**FTIR (neat, cm<sup>-1</sup>):** 3130, 2874, 1668, 1562, 1173, 961 cm<sup>-1</sup>.

**Mp (°C):** 112 °C.

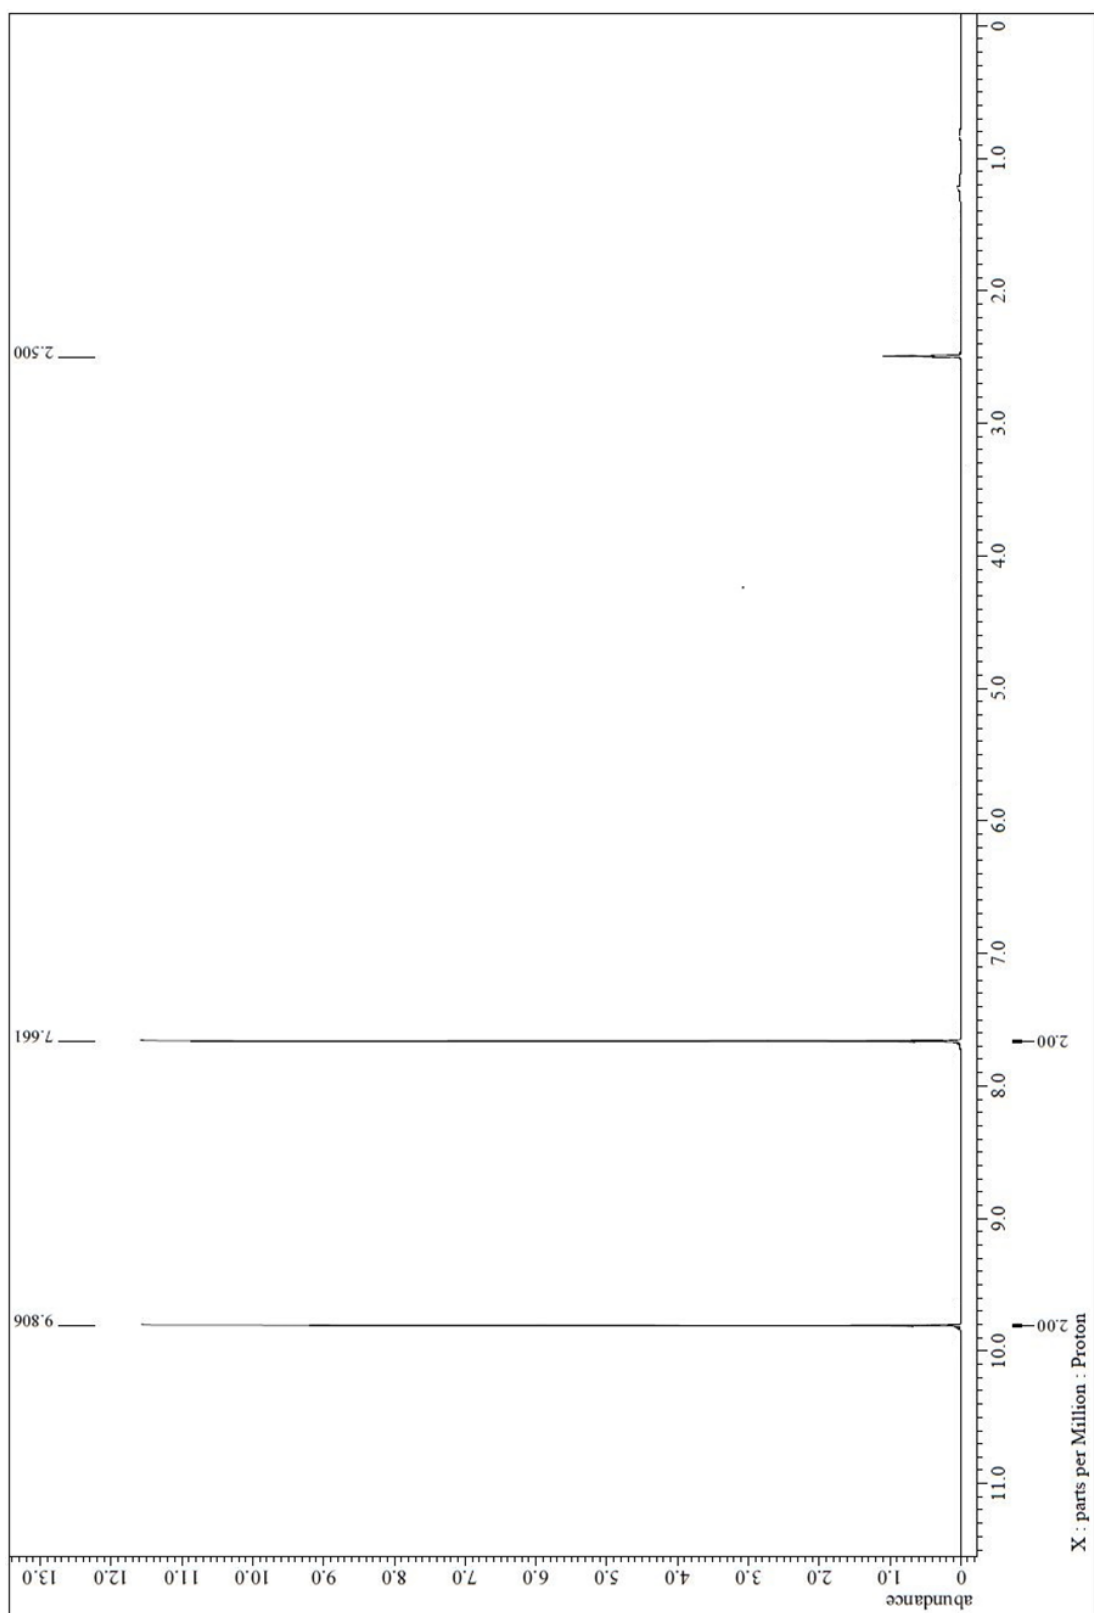

**Figure S7.** <sup>1</sup>H spectrum of 2,5-diformylfuran.

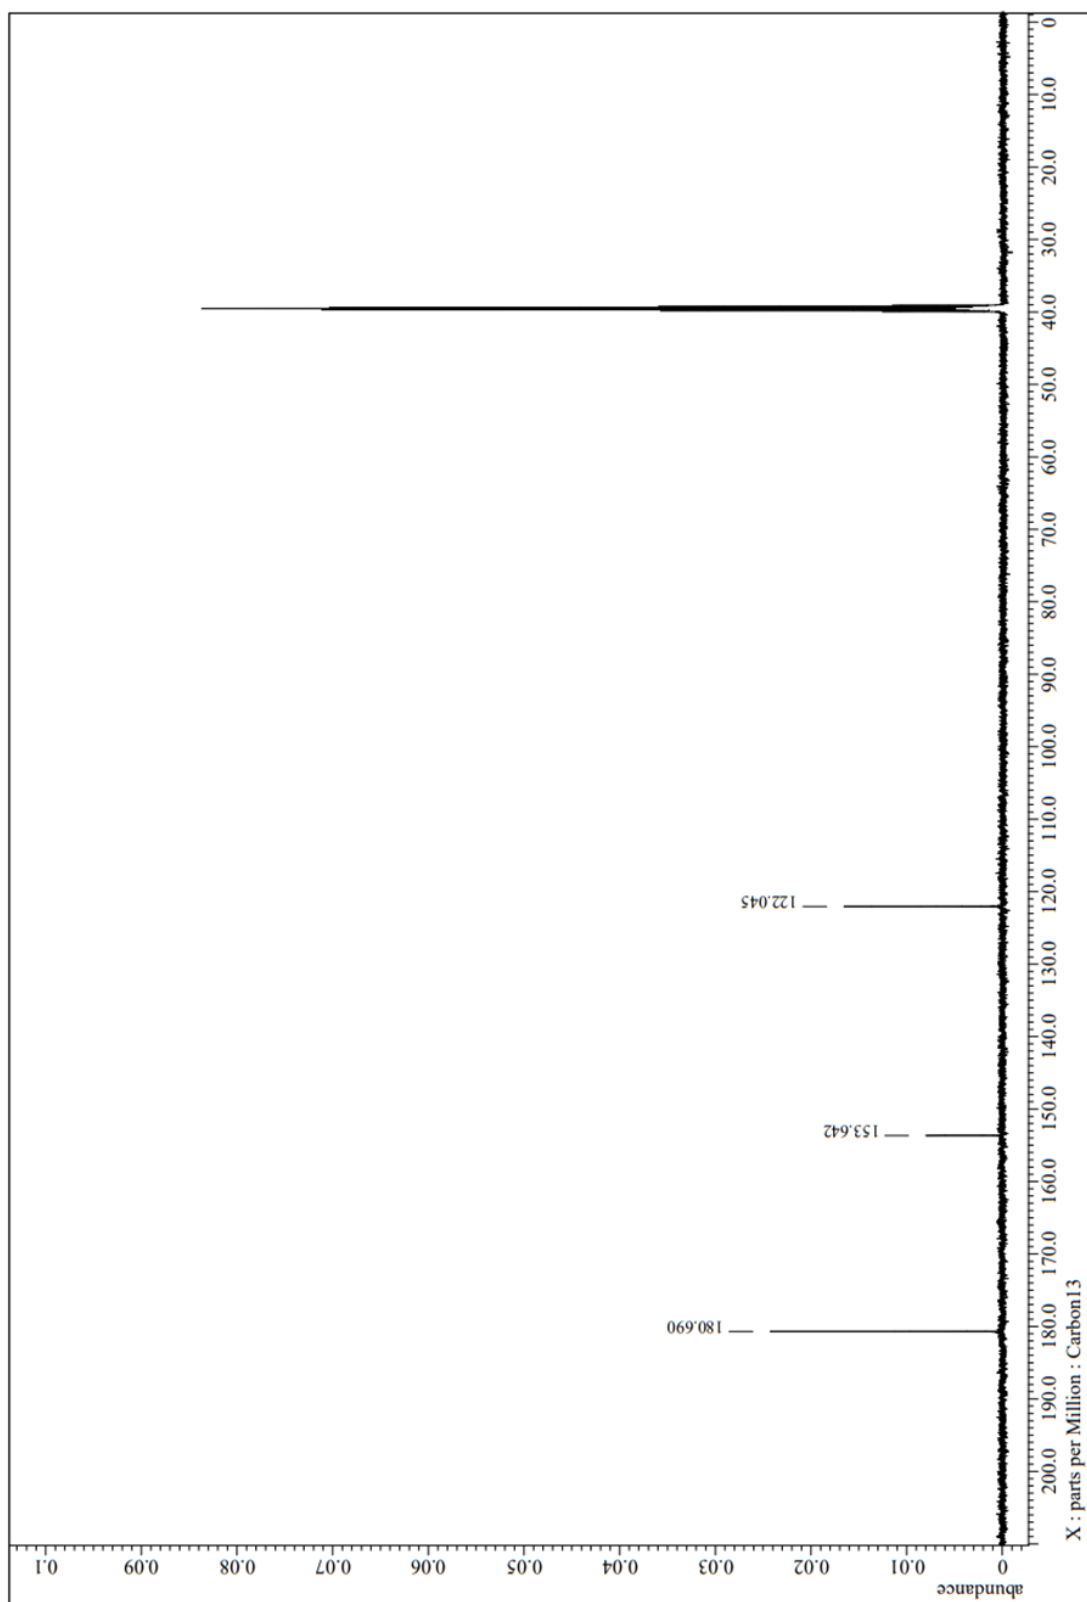

**Figure S8.**  $^{13}\text{C}$  spectrum of 2,5-diformylfuran.

## VII. $^1\text{H}$ NMR of the reaction mixture using fructose

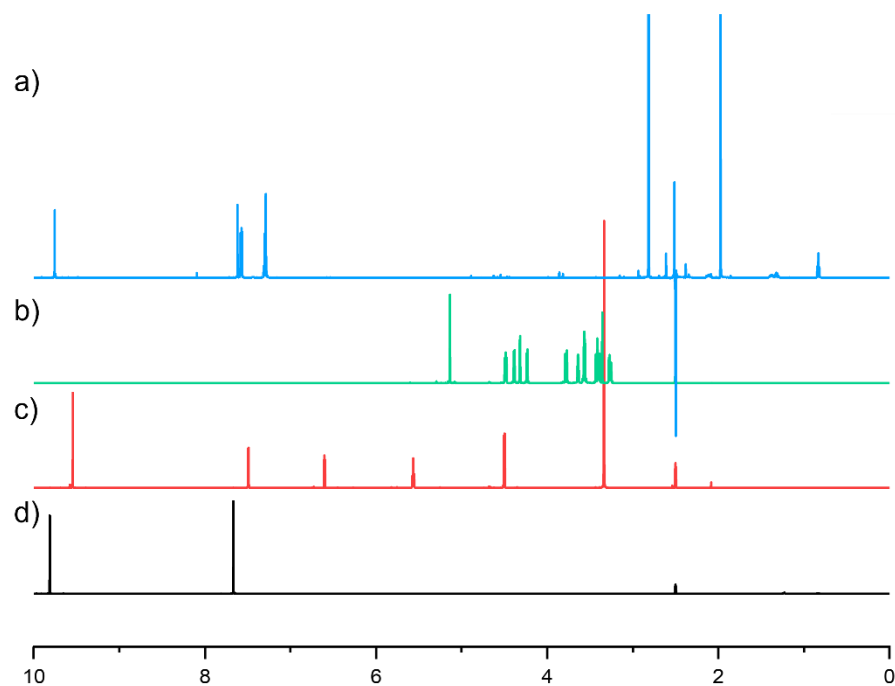

**Figure S9.**  $^1\text{H}$  spectra of **a)** the reaction mixture of fructose, TBPBr (10 mol%), and PhSSPh in DMSO (the reaction mixture contains DFF, dimethyl sulfide, and intermediates derived from diphenyldisulfide), **b)** fructose, **c)** HMF, and **d)** DFF
